# Supplementary material for: A super-high brightness and excellent colour quality laser-driven white light source enables miniaturized endoscopy
Source: Royal Society of Chemistry journal article supplement (doi:10.1039/d3mh01170d), 2023-01-01
Supplement: d3mh01170d1.pdf [file d3mh01170d1.pdf]

## **Super-high brightness and excellent colour quality laser-driven white light source enables miniaturized endoscopy**

Shuxing Li,<sup>a</sup> Linhui Huang,<sup>a</sup> Yunqin Guo,<sup>a</sup> Le Wang,<sup>\*b</sup> and Rong-Jun Xie<sup>\*ac</sup>

<sup>a</sup>Fujian Provincial Key Laboratory of Surface and Interface Engineering for High Performance Materials, College of Materials, Xiamen University, Xiamen 361005, China

<sup>b</sup>College of Optical and Electronic Technology, China Jiliang University, Hangzhou 310018, China

E-mail: calla@cjlu.edu.cn.

<sup>c</sup>State Key Laboratory of Physical Chemistry of Solid Surfaces, Xiamen University, Xiamen 361005, China

E-mail: rjxie@xmu.edu.cn

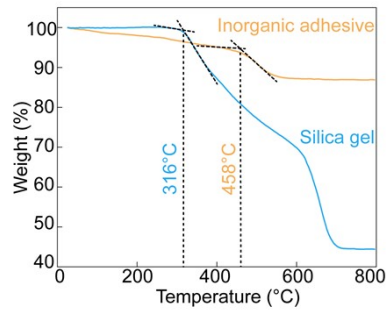

**Fig. S1** Thermogravimetric analyses (TGA) of silica gel and inorganic adhesive.

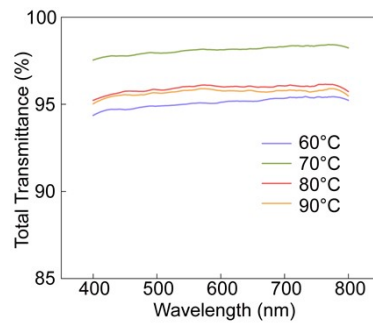

**Fig. S2** Total transmittance of inorganic adhesive in the visible-light-spectrum range.

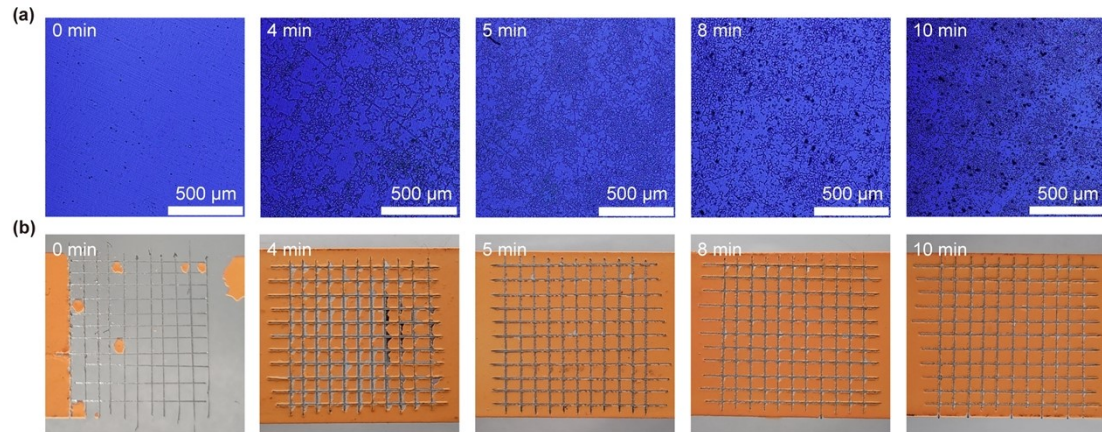

**Fig. S3** (a) Surface microscope images of Al substrate by etching with alkaline for 0 ~ 10 mins, respectively. (b) Scratch test results of CASN@Al phosphor converters, where Al substrates were etched for 0, 4, 5, 8 and 10 mins, respectively.

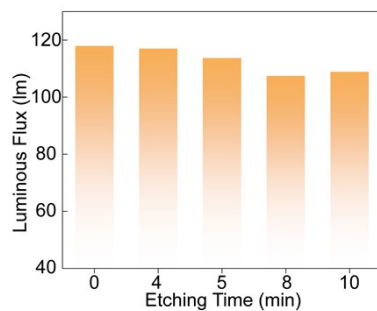

**Fig. S4** Output luminous fluxes of CASN@Al phosphor converters, where Al substrates were etched for 0, 4, 5, 8 and 10 mins, respectively.

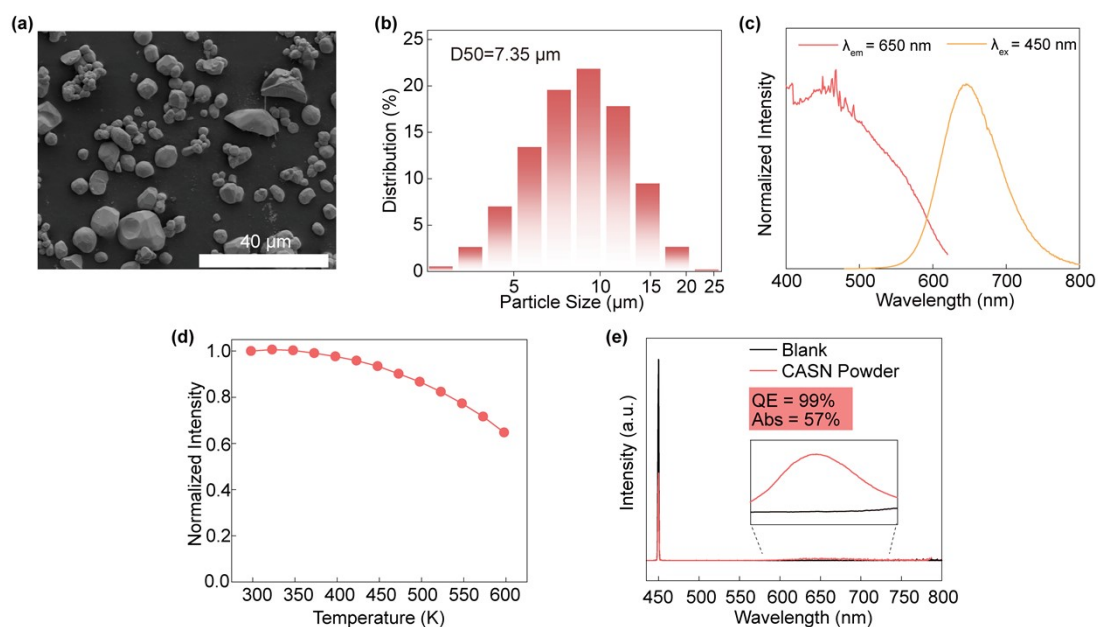

**Fig. S5** Fundamental properties of CASN powders. (a) Morphology. (b) Size distributions. (c) Photoluminescence (PL) spectra. (d) Thermal quenching. (e) Quantum efficiency (QE) and absorption efficiency (Abs).

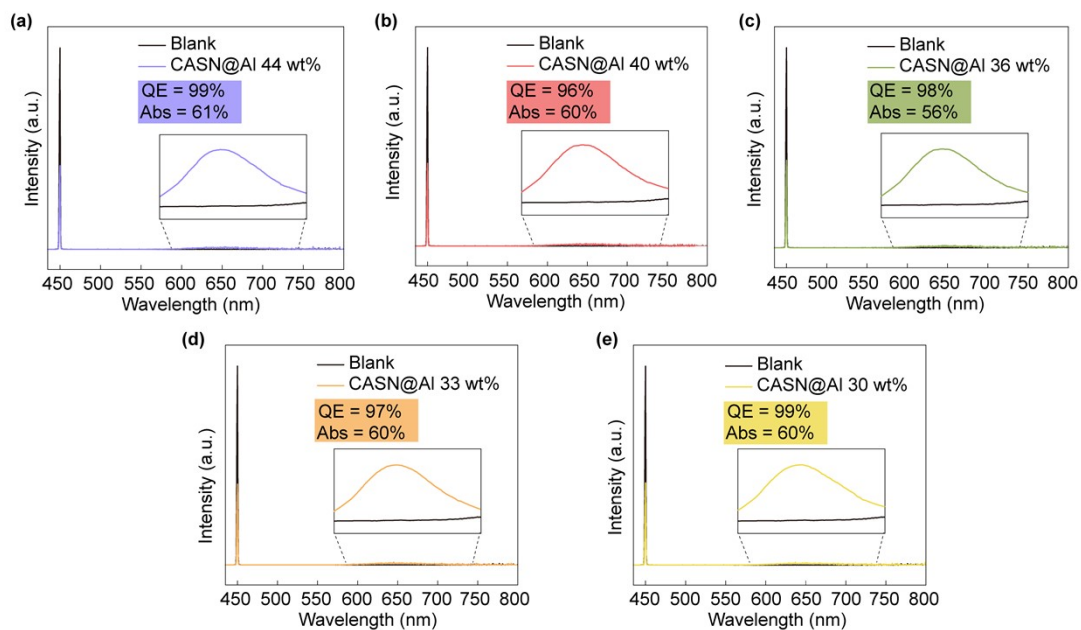

**Fig. S6** Photoluminescence spectra of CASN@Al with different CSAN concentrations for QE determination.

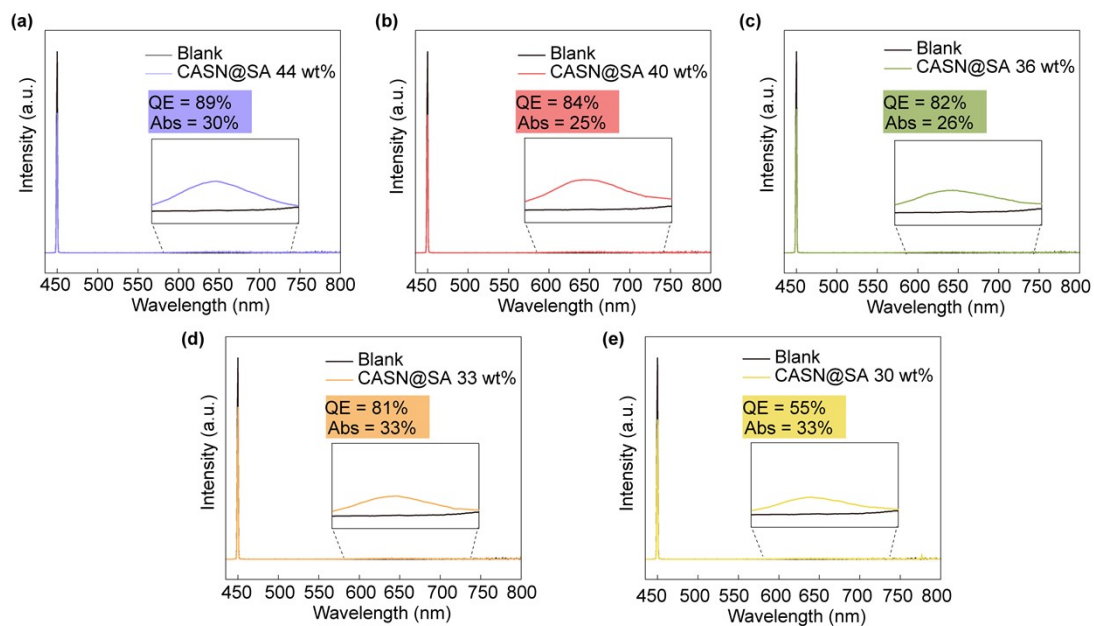

**Fig. S7** Photoluminescence spectra of CASN@SA with different CASN concentrations for QE determination.

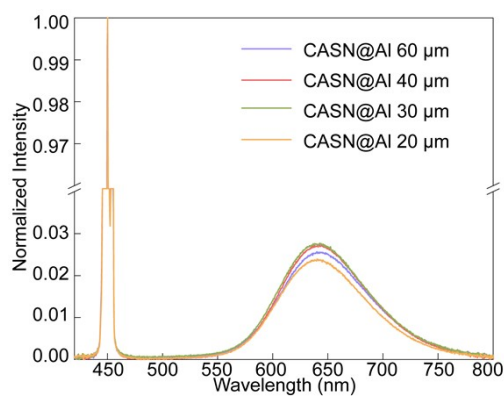

**Fig. S8** Emission spectra of CASN@Al with different phosphor film thicknesses under the excitation of a laser power density of  $1.22 \text{ W/mm}^2$ .

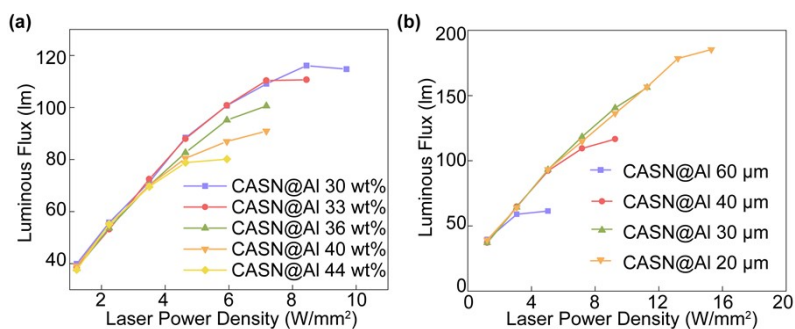

**Fig. S9** Output luminous fluxes of CASN@Al with (a) different CASN concentration or (b) different film thickness as a function of incident laser power density.

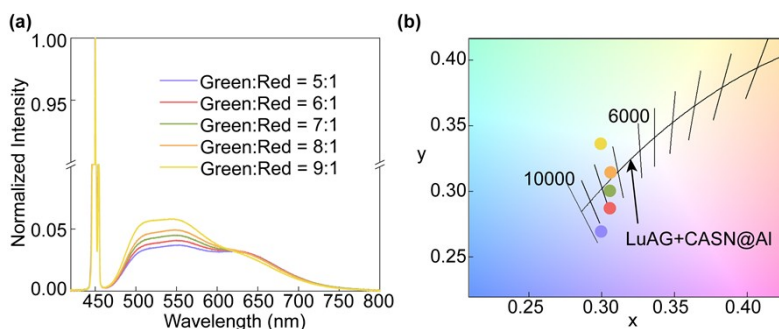

**Fig. S10** Emission spectra (a) and CIE colour coordinates (b) of LuAG+CASN@Al with green to red ratios changing from 5:1 to 9:1 under the excitation of a blue laser power density of 1.22 W/mm<sup>2</sup>.

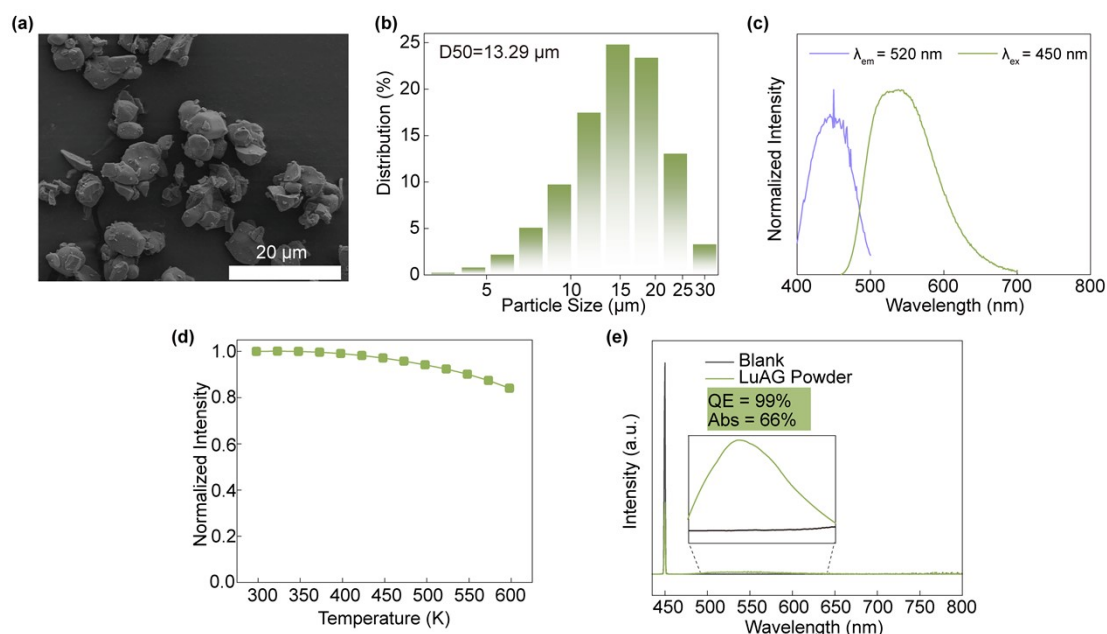

**Fig. S11** Fundamental properties of LuAG powders. (a) Morphology. (b) Size distributions. (c) Photoluminescence (PL) spectra. (d) Thermal quenching. (e) Quantum efficiency (QE) and absorption efficiency (Abs).

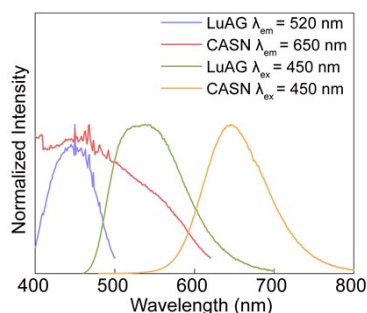

**Fig. S12** Photoluminescence (PL) spectra of CASN and LuAG powders.

**Table S1** QEs and absorptions of CASN@Al and CASN@SA with different phosphor concentrations.

| CASN concentration (wt%) | CASN@Al |                | CASN@SA |                |
|--------------------------|---------|----------------|---------|----------------|
|                          | QE (%)  | Absorption (%) | QE (%)  | Absorption (%) |
| 30                       | 99      | 67             | 89      | 33             |
| 33                       | 96      | 67             | 84      | 33             |
| 36                       | 98      | 74             | 82      | 26             |
| 40                       | 97      | 75             | 81      | 25             |
| 44                       | 99      | 70             | 55      | 30             |

**Table S2** Luminous flux and luminous efficacy of LuAG+CASN@Al and LuAG/CASN@Al under excitation of incident blue laser power density increasing from 1.22 to 5.94 W/mm<sup>2</sup>.

| Laser power<br>density<br>(W/mm <sup>2</sup> ) | LuAG+CASN@Al          |                                | LuAG/CASN@Al          |                                |
|------------------------------------------------|-----------------------|--------------------------------|-----------------------|--------------------------------|
|                                                | Luminous<br>flux (lm) | Luminous<br>efficacy<br>(lm/W) | Luminous<br>flux (lm) | Luminous<br>efficacy<br>(lm/W) |
| 1.22                                           | 133                   | 217                            | 158                   | 258                            |
| 2.24                                           | 194                   | 173                            | 220                   | 196                            |
| 3.50                                           | 259                   | 148                            | 294                   | 168                            |
| 4.64                                           | 326                   | 140                            | 365                   | 157                            |
| 5.95                                           | 384                   | 129                            | 433                   | 146                            |

**Table S3** A summary of luminous flux and luminous efficacy of reported laser-driven white light sources with Ra above 90.

|   | Luminous<br>flux (lm) | Luminous<br>efficacy (lm/W) | Refs      | Notes*               |
|---|-----------------------|-----------------------------|-----------|----------------------|
| 1 | 288                   | 102                         | [17]      | Transmissive surface |
| 2 | 404                   | 137                         | [19]      | Total surfaces       |
| 3 | 183                   | 85                          | [20]      | Total surfaces       |
| 4 | 110                   | 120                         | [21]      | Transmissive surface |
| 5 | 220                   | 121                         | [22]      | Total surfaces       |
| 6 | 373                   | 106                         | [23]      | Transmissive surface |
| 7 | 433                   | 146                         | This work | Reflective surface   |

\*According to the optical configuration, white light is collected on either the transmissive or reflective surface of the phosphor relative to the incident direction of blue laser. It is worth mentioning that the total luminous flux, collected from all surfaces of the phosphor, is unsuitable as a reference for practical applications of laser-driven white light sources.
